# Supplementary material for: Development of Moringa oleifera as functional food targeting NRF2 signaling: antioxidant and anti-inflammatory activity in experimental model systems
Source: Royal Society of Chemistry journal article supplement (doi:10.1039/d3fo00572k), 2023-01-01
Supplement: d3fo00572k1.pdf [file d3fo00572k1.pdf]

**Supplementary Data:**

**Supplementary Table 1-** List of primers used in the study.

| Gene            | Primer sequence          |                          | Gen Bank Number |
|-----------------|--------------------------|--------------------------|-----------------|
|                 | Forward 5'-3'            | Reverse 5'-3'            |                 |
| <i>hNQO1</i>    | TGCAGCGGCTTTGAAGAAGAAAGG | TCGGCAGGATACTGAAAGTTCGCA | NM_001025434.2  |
| <i>hHMOX1</i>   | ATTGCCAGTGCCACCAAGTTCAAG | ACGCAGTCTTGGCCTCTTCTATCA | NM_002133.3     |
| <i>hGCLC</i>    | AAGCCATTCACTCCAGATTTTACC | ACAACAACTTCAACGCAAAGC    | NM_001197115.2  |
| <i>hβ-ACTIN</i> | TTCTACAATGAGCTGCGTGTG    | GGGGTGTGAAGGTCTCAAA      | NM_001101.5     |
| <i>mNqo1</i>    | AGGATGGGAGGTACTCGAATC    | AGGCGTCCTTCCCTTATATGCTA  | NM_008706.5     |
| <i>mHmox1</i>   | GGTGATGGCTTCTTGTAACC     | AGTGAGGCCCATACCAGAAG     | NM_010442.2     |
| <i>mGclc</i>    | ATGATAGAACACGGGAGGAGAG   | TGATCCTAAAGCGATTGTTCTTC  | NM_010295.2     |
| <i>mIi-6</i>    | TTCCATCCAGTTGCCTTCTTGG   | TTCTCATTTCCACGATTTCCAG   | NM_001314054.1  |
| <i>mIi-1β</i>   | AACCTGCTGGTGTGTGACGTTT   | CAGCACGAGGCTTTTTTGTGT    | NM_008361.4     |
| <i>mTnf-α</i>   | GGCATGGATCTCAAAGACAACC   | CAGGTATATGGGCTCATACCAG   | NM_001278601.1  |
| <i>mNos2</i>    | GGCAGCCTGTGAGACCTTTG     | CATTGGAAGTGAAGCGTTTCG    | NM_001313922.1  |
| <i>Mβ-actin</i> | GGCTGTATTCCCCTCCATCG     | CCAGTTGGTAACAATGCCATGT   | NM_007393.5     |

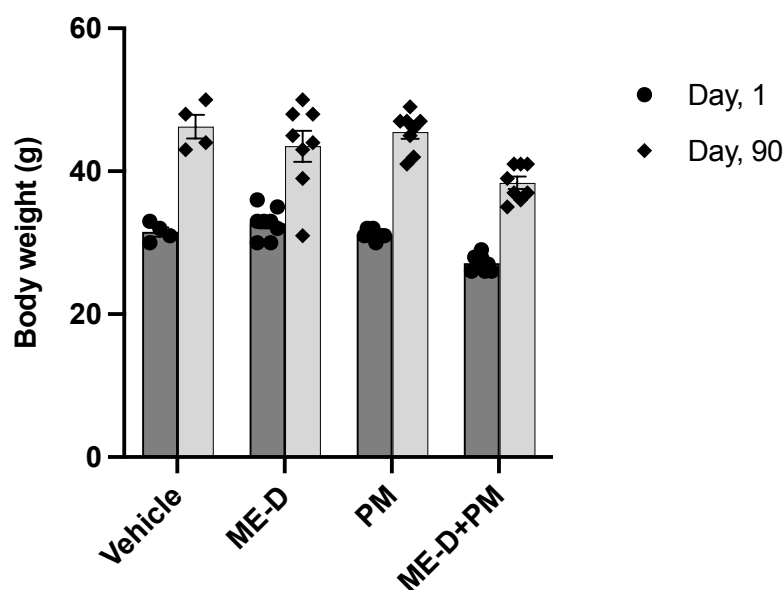

**Supplementary Fig.1.** Body weight gain in PM-exposed mice co-administered with ME-D or vehicle for three months. Swiss Albino mice were exposed to PM or vehicle alternate days weekly three times for 3-months. Mice were also concurrently treated with ME-D or PBS by oral gavage (weekly for three days). Body weight was recorded on day1 and day 90. Data represented as mean  $\pm$  SEM; (N=4-7/group).  $^{\S}P < 0.05$ ,  $^{\#}P < 0.01$ , and  $^*P < 0.001$  compared with the vehicle control.

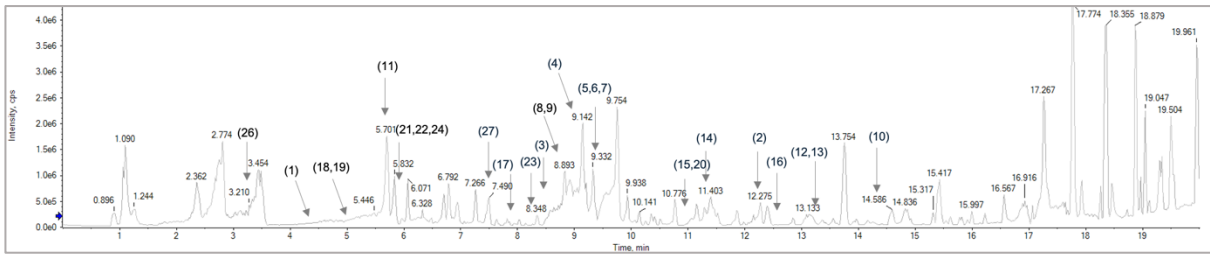

**Supplementary Fig.2. LC-HRMS biochemical profile of ME-D dietary preparation.** The number in bracket corresponds to key bioactive compounds listed in Table 2.

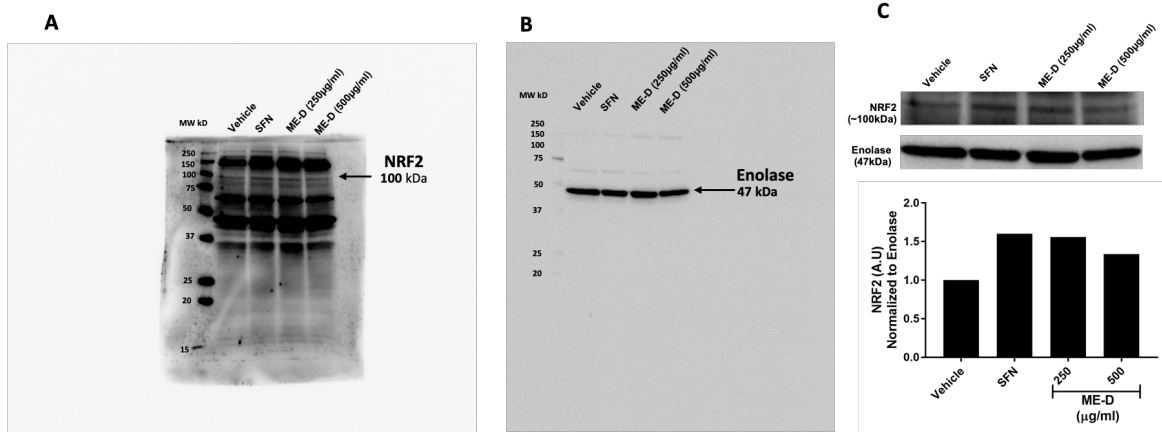

**Supplementary Fig.3.** Uncropped images (A-B) and cropped image with quantification (C) of the immunoblot used in Fig.3F in the main text. Immunoblot of whole cell extracts prepared from BEAS2B cells after treatment with sulforaphane (SFN), ME-D or vehicle using anti-Nrf2 antibody (~100kDa) (A). The blot was stripped and re-probed with anti-enolase (B).
